# Supplementary material
Source: PubMed Central journal article supplement (PMC5446537)

## TMEM100 is associated with prognosis in NSCLC

**Supplementary Table 1.** PCR primers used in this study

| Gene name | Forward               | Reverse              | Product length |
|-----------|-----------------------|----------------------|----------------|
| TMEM100   | AGAAGTTGGACGAAGAGG    | CAGAGGGACTGTGGTGAT   | 260 bp         |
| TNF       | CGAGTCTGGGCAGGTCTA    | GTGGTGGTCTTGTGCTTAA  | 196 bp         |
| TRADD     | GAAATCTGAAGTGC GGCTCG | AAAGTCTGGGCAGGTGGC   | 127 bp         |
| FOS       | GGGGCAAGGTGGAACAGTTAT | CCGCTTGAGTGTATCAGTCA | 126 bp         |
| JUN       | CTGCGTCTTAGGCTTCTCC   | CTCGCCCAAGTTCAACAA   | 113 bp         |
| BCL3      | GTGCAGATGAGGACGGAGACA | GCCGGACCACAGACGGTAAT | 180 bp         |
| EDN1      | CACCTGGACATCATTGG     | GTCTCCGACCTGGTTTGT   | 341 bp         |
| CSF1      | TGCGTCCGAACCTTCTATG   | CACTGCTAGGATGGCTTT   | 202 bp         |
| GAPDH     | AACGGATTGGTCGTATTG    | GGAAGATGGTGATGGGATT  | 208 bp         |

TMEM100 is associated with prognosis in NSCLC

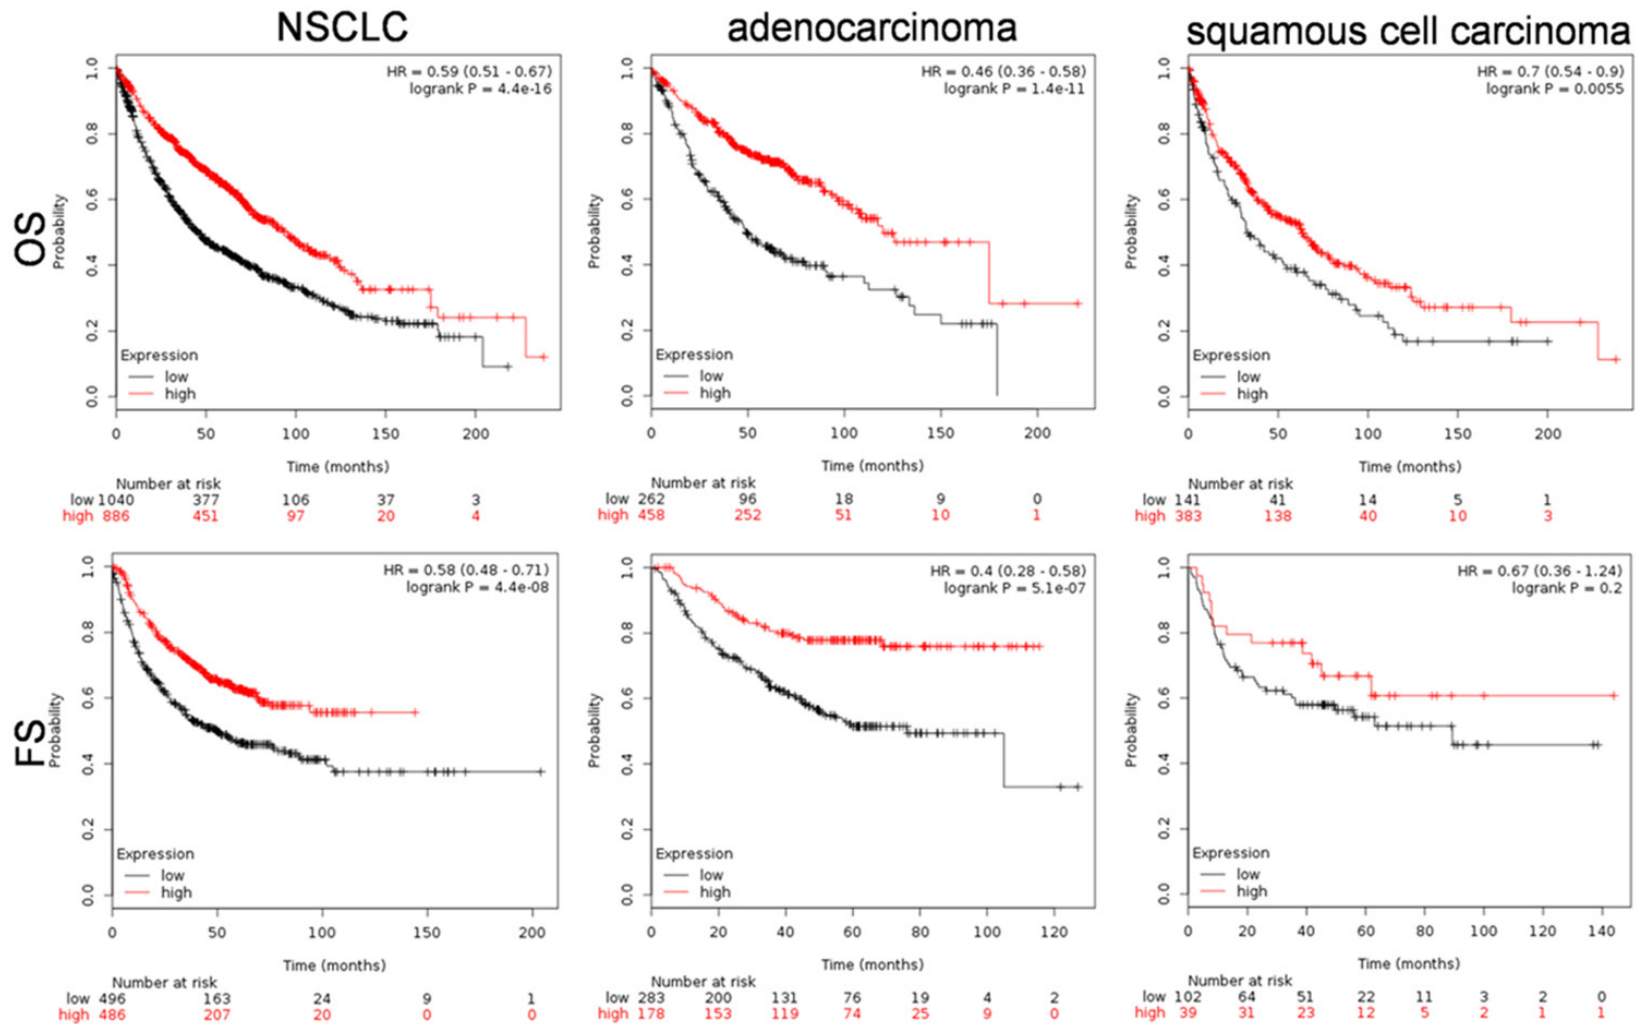

**Supplementary Figure 1.** Overall survival and disease-free survival were analyzed according to the expression of TMEM100 in NSCLC by KaplanMeier method and log-rank test. The results showed that NSCLC patients with high TMEM100 expression had better overall survival than those with low TMEM100 expression. Analysis for disease-free survival showed the same result.

## TMEM100 is associated with prognosis in NSCLC

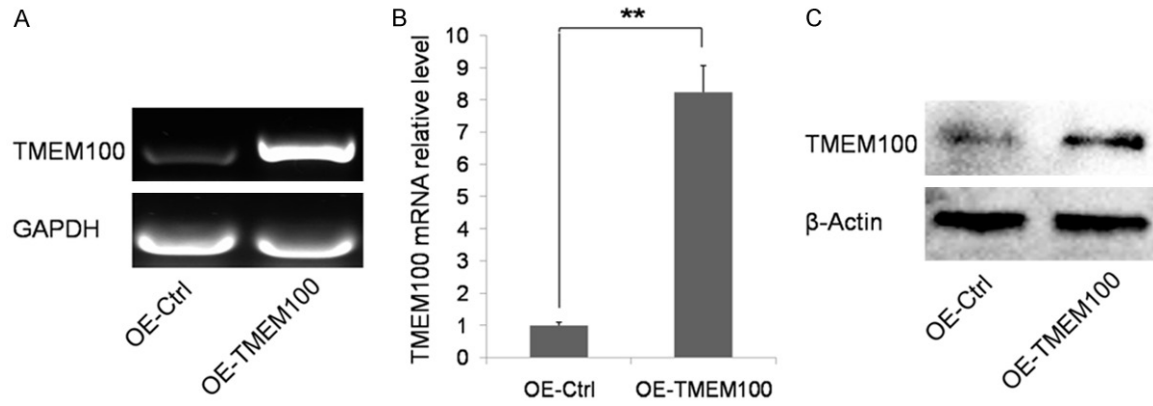

**Supplementary Figure 2.** PC9 cells infected with control vector or TMEM100 lentivirus. (A-C) Confirmation of TMEM100 overexpression after infected with control vector or TMEM100 lentivirus by PCR and Western blot.

# TMEM100 is associated with prognosis in NSCLC

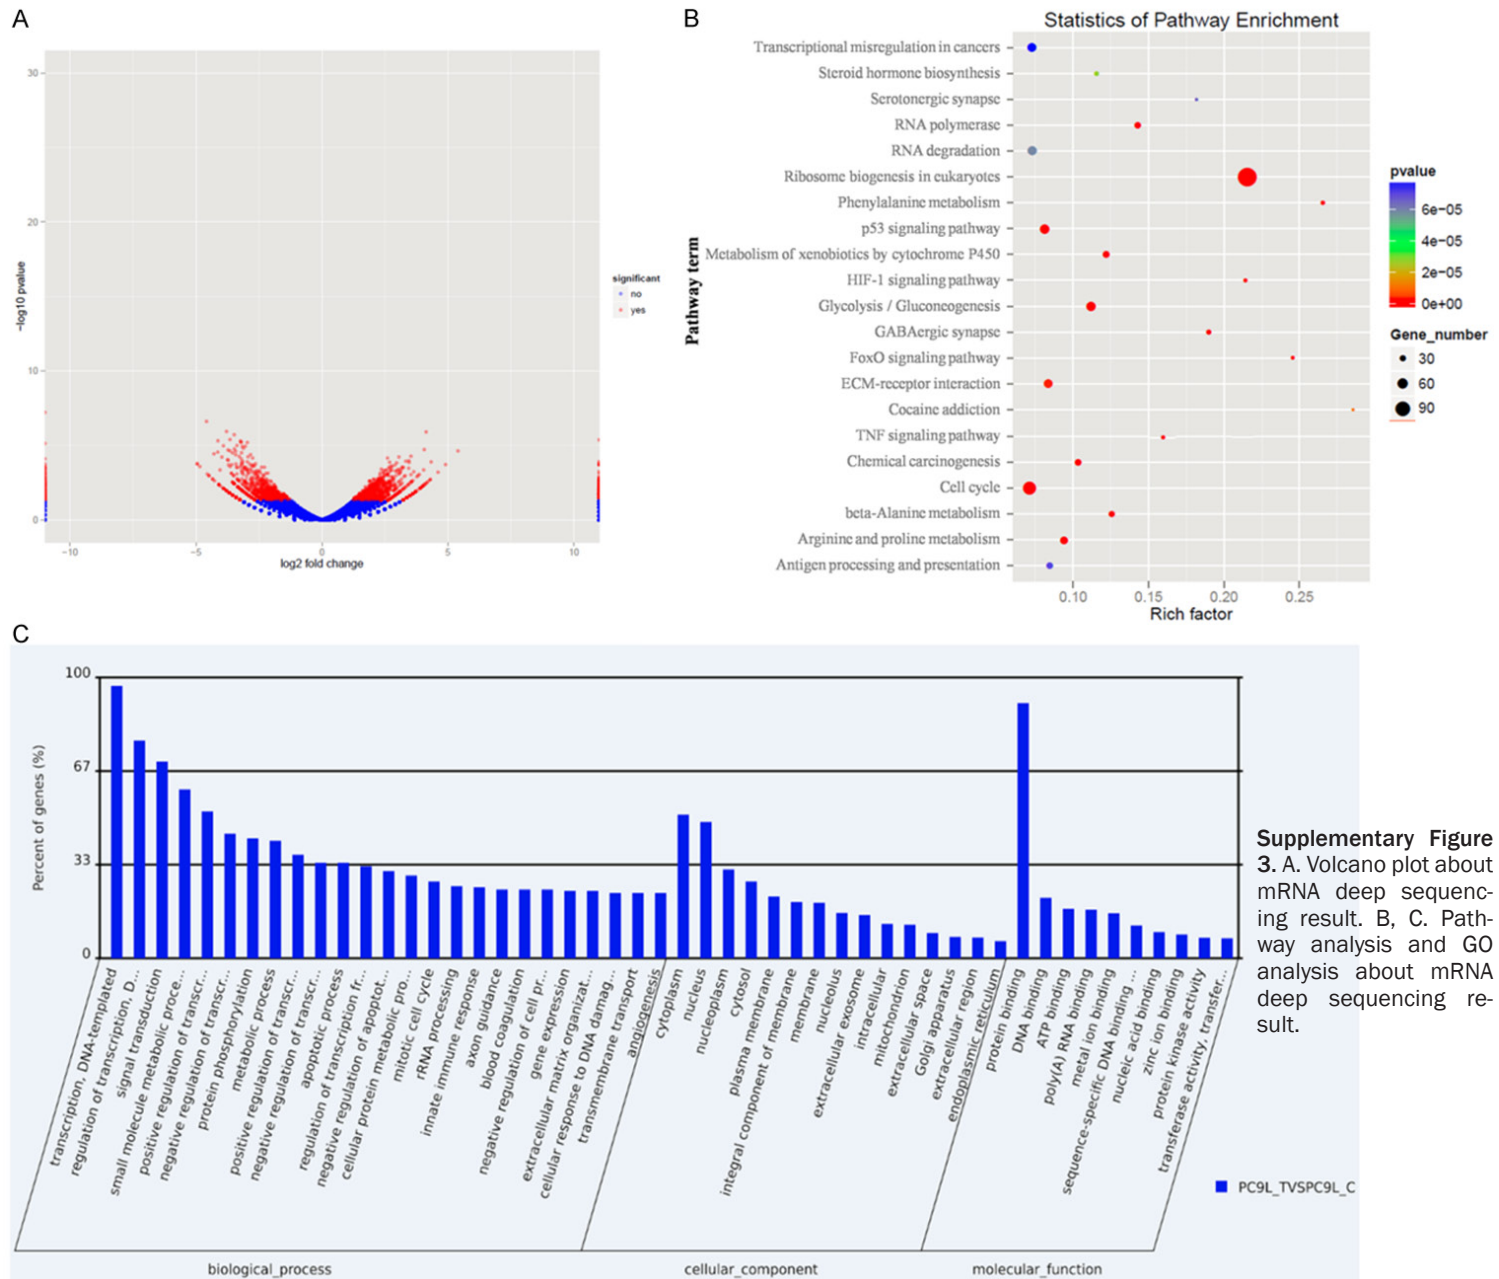

Supplement: ajtr0009-2567-f7.pdf [file ajtr0009-2567-f7.pdf]
